# Supplementary material for: Tumor Evolution in Two Patients with Basal-like Breast Cancer: A Retrospective Genomics Study of Multiple Metastases
Source: PubMed Central journal article supplement (PMC5140046; doi:10.1371/journal.pmed.1002174), 2016-12-06

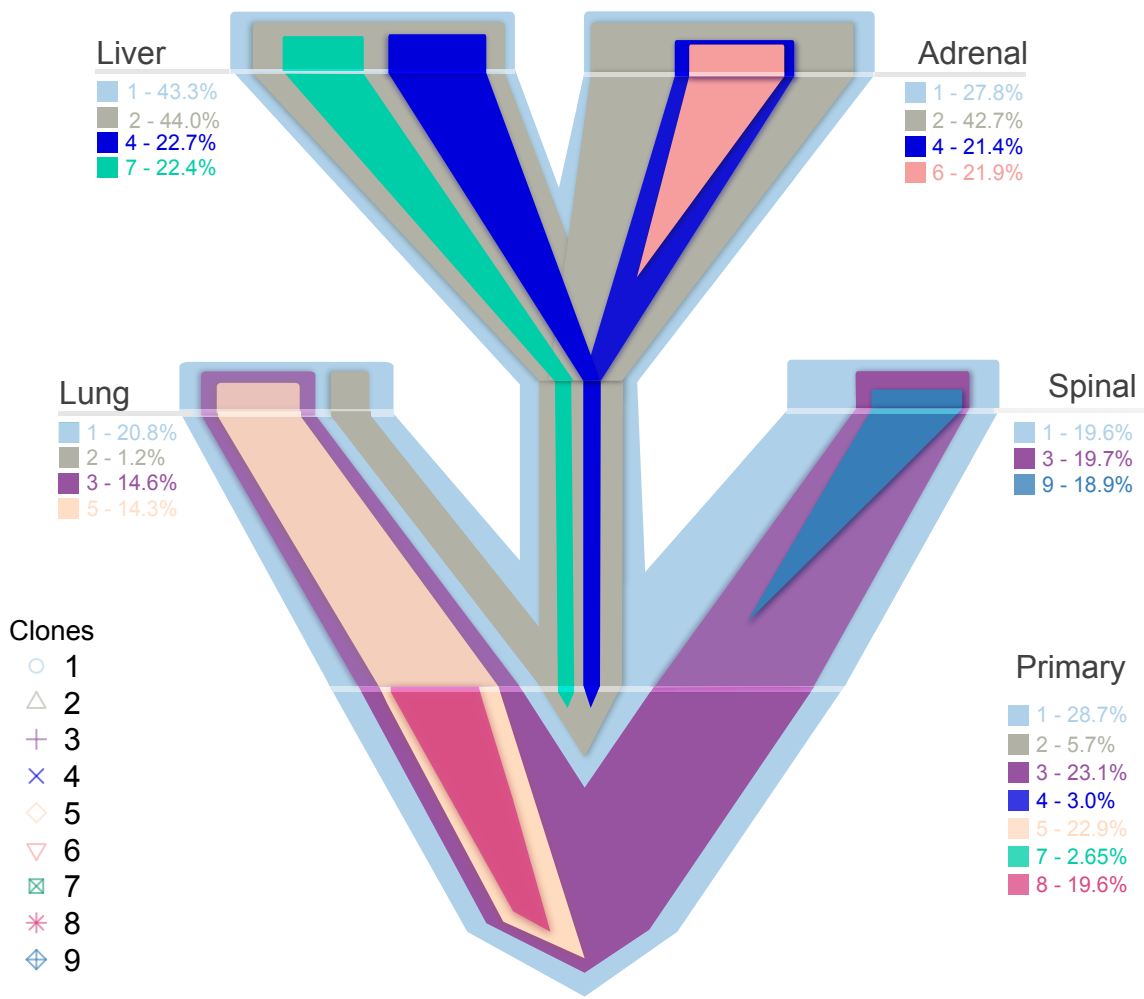

Supplement: pmed.1002174.s009.pdf [file pmed.1002174.s009.pdf]
