# Supplementary material for: Tumor Evolution in Two Patients with Basal-like Breast Cancer: A Retrospective Genomics Study of Multiple Metastases
Source: PLoS Med. 2016 Dec 6;13(12):e1002174. doi: 10.1371/journal.pmed.1002174 (PMC5140046; doi:10.1371/journal.pmed.1002174)
Supplement: S2 Table — Includes coverage of input base pairs (Gb), haploid coverage, and concordance with heterozygous SNPs. (XLS) [file pmed.1002174.s013.xls]

## Sheet: Sheet1
Supplemental Table 2: Whole genome coverage statsitics.
	Input bp(Gb)	Haploid coverage	Heterozygous SNP concordance
A7_Normal	138.381	34.333	0.8153
A7_Primary	118.759	35.388	0.8184
A7_Livermet	260.928	70.196	0.8166
A7_Lungmet	128.692	33.175	0.8208
A7_Rib	204.34	53.975	0.8082
A7_Kidney	201.663	53.758	0.8047
A7_Brain	156.823	42.891	0.8084
A1_Normal	265.531	72.168	0.8908
A1_Primary	134.068	35.939	0.8933
A1_Livermet	115.853	30.648	0.8911
A1_Lungmet	210.454	54.794	0.8903
A1_Adrenalmet	114.313	29.237	0.8963
A1_Spinalmet	131.027	29.976	0.8843
